# Supplementary material
Source: Springer Nature journal article supplement (https://www.springermedizin.de/resource/supplementary/13019_2009_235_MOESM3_ESM.pdf/9638234)

Probability  
of survival

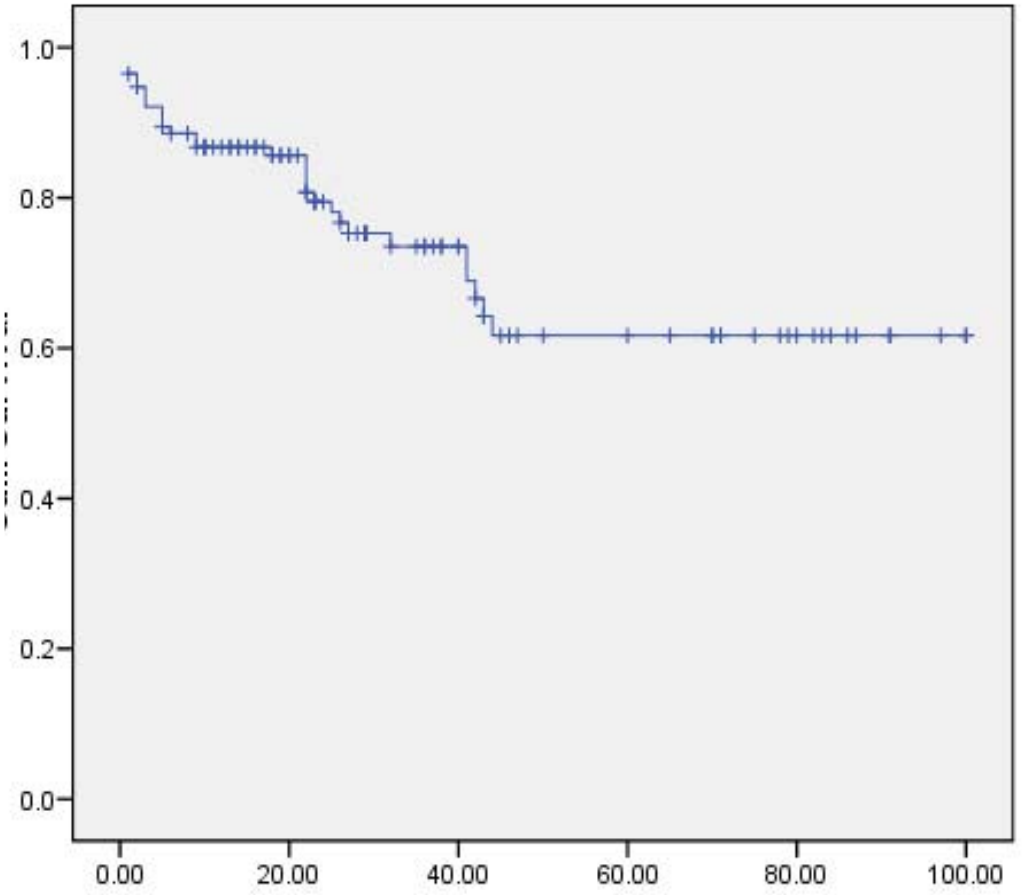

Months

Supplement: MOESM3 [file 9638234]
